# Supplementary material
Source: publisher figshare collection journal article supplement (https://plos.figshare.com/articles/dataset/_/4804033)
Supplement: Supplementary file [file 1]

S2 Table List of rodent genera detected in rodent pest research in African agricultural systems from 1960 – 2015

| <b>Genus</b>           | <b>Number of studies</b> |
|------------------------|--------------------------|
| <i>Mastomys</i>        | 70                       |
| <i>Arvicanthis</i>     | 42                       |
| <i>Rattus</i>          | 38                       |
| <i>Mus</i>             | 27                       |
| <i>Lemniscomys</i>     | 14                       |
| <i>Gerbilliscus</i>    | 18                       |
| <i>Cricetomys</i>      | 11                       |
| <i>Meriones</i>        | 10                       |
| <i>Thryonomys</i>      | 9                        |
| <i>Xerus</i>           | 9                        |
| <i>Acomys</i>          | 7                        |
| <i>Dasymus</i>         | 7                        |
| <i>Rhabdomys</i>       | 7                        |
| <i>Hystrix</i>         | 6                        |
| <i>Lophuromys</i>      | 6                        |
| <i>Graphiurus</i>      | 5                        |
| <i>Praomys</i>         | 5                        |
| <i>Saccostomus</i>     | 5                        |
| <i>Steatomys</i>       | 5                        |
| <i>Taterillus</i>      | 5                        |
| <i>Aethomys</i>        | 4                        |
| <i>Thallomys</i>       | 4                        |
| <i>Atherurus</i>       | 3                        |
| <i>Grammomys</i>       | 3                        |
| <i>Paraxerus</i>       | 3                        |
| <i>Pelomys</i>         | 3                        |
| <i>Stenocephalemys</i> | 3                        |
| <i>Thamnomys</i>       | 3                        |
| <i>Uranomys</i>        | 3                        |
| <i>Crocidura</i>       | 2                        |
| <i>Funisciurus</i>     | 2                        |
| <i>Heliosciurus</i>    | 2                        |
| <i>Malacomys</i>       | 2                        |
| <i>Oenomys</i>         | 2                        |
| <i>Anomalurus</i>      | 1                        |
| <i>Cryptomys</i>       | 1                        |
| <i>Dendromus</i>       | 1                        |
| <i>Desmodilliscus</i>  | 1                        |
| <i>Heterocephalus</i>  | 1                        |

|                     |   |
|---------------------|---|
| <i>Hlinsciurns</i>  | 1 |
| <i>Hybomys</i>      | 1 |
| <i>Hylomyscus</i>   | 1 |
| <i>Jaculus</i>      | 1 |
| <i>Nesokia</i>      | 1 |
| <i>Otomys</i>       | 1 |
| <i>Pachyuromys</i>  | 1 |
| <i>Protoxerus</i>   | 1 |
| <i>Psammonys</i>    | 1 |
| Sciuridae           | 1 |
| <i>Spalax</i>       | 1 |
| <i>Tachyoryctes</i> | 1 |
|                     |   |
|                     |   |
