# Supplementary material
Source: publisher figshare collection journal article supplement (https://plos.figshare.com/articles/dataset/_/4804033)
Supplement: Supplementary file [file 1]

S3 Table List of different crops and cropping system as impacted by rodent pests in African agriculture (1960-2015)

| Crop list    | Nr of studies | Prop | Crop Category list | Nr of studies | Prop |
|--------------|---------------|------|--------------------|---------------|------|
| Maize        | 55            | 0.22 | Grain              | 128           | 0.56 |
| Rice         | 21            | 0.08 | Root vegetable     | 22            | 0.10 |
| Wheat        | 17            | 0.07 | Fruit tree         | 17            | 0.07 |
| Crops        | 16            | 0.06 | Vegetables         | 16            | 0.07 |
| Cassava      | 10            | 0.04 | Sugarcane          | 9             | 0.04 |
| Sorghum      | 10            | 0.04 | Groundnut          | 8             | 0.04 |
| Grain        | 9             | 0.04 | Legume             | 8             | 0.04 |
| Sugarcane    | 9             | 0.04 | Cacao              | 6             | 0.03 |
| Groundnut    | 8             | 0.03 | Coconut            | 4             | 0.02 |
| Millet       | 8             | 0.03 | Cotton             | 3             | 0.01 |
| Beans        | 7             | 0.03 | Palm               | 3             | 0.01 |
| Barley       | 6             | 0.02 | Fodder             | 2             | 0.01 |
| Cacao        | 6             | 0.02 | Coffee             | 1             | 0.00 |
| Coconut      | 4             | 0.02 | Plantation         | 1             | 0.00 |
| Fallow       | 4             | 0.02 |                    |               |      |
| Legumes      | 4             | 0.02 |                    |               |      |
| Vegetables   | 4             | 0.02 |                    |               |      |
| Yams         | 4             | 0.02 |                    |               |      |
| Banana       | 3             | 0.01 |                    |               |      |
| Cotton       | 3             | 0.01 |                    |               |      |
| Fruit        | 3             | 0.01 |                    |               |      |
| Palm         | 3             | 0.01 |                    |               |      |
| Potato       | 3             | 0.01 |                    |               |      |
| Root crops   | 3             | 0.01 |                    |               |      |
| Cowpea       | 2             | 0.01 |                    |               |      |
| Lucerne      | 2             | 0.01 |                    |               |      |
| Olive        | 2             | 0.01 |                    |               |      |
| Orchard      | 2             | 0.01 |                    |               |      |
| Sweet potato | 2             | 0.01 |                    |               |      |
| Tomato       | 2             | 0.01 |                    |               |      |
| Almond       | 1             | 0.00 |                    |               |      |
| Banana       | 1             | 0.00 |                    |               |      |
| Cabbage      | 1             | 0.00 |                    |               |      |
| Carob        | 1             | 0.00 |                    |               |      |
| Citrus       | 1             | 0.00 |                    |               |      |
| Coffee       | 1             | 0.00 |                    |               |      |
| Dates        | 1             | 0.00 |                    |               |      |
| Enset        | 1             | 0.00 |                    |               |      |
| Grass        | 1             | 0.00 |                    |               |      |
| Lentils      | 1             | 0.00 |                    |               |      |
| Onions       | 1             | 0.00 |                    |               |      |

|            |   |      |
|------------|---|------|
| Pea        | 1 | 0.00 |
| Plantain   | 1 | 0.00 |
| Plantation | 1 | 0.00 |
| Pumpkin    | 1 | 0.00 |
| Sesame     | 1 | 0.00 |
